# Supplementary material for: Targeting the High-Density Lipoprotein Proteome for the Treatment of Post-Acute Sequelae of SARS-CoV-2
Source: MDPI journal article supplement (doi:10.3390/ijms25084522), 2024-04-20
Supplement: s1 [file s1]

## Supplemental Material

# Targeting the High-density Lipoprotein Proteome for the Treatment of Postacute Sequelae of SARS-CoV-2

Karsten Grote<sup>1†</sup>, Ann-Christin Schaefer<sup>1†</sup>, Muhidien Soufi<sup>1</sup>, Volker Ruppert<sup>1</sup>, Uwe Linne<sup>2</sup>, Aditya Bhagwat<sup>3</sup>, Witold Szymanski<sup>3</sup>, Johannes Graumann<sup>3</sup>, Yana Gercke<sup>1</sup>, Sümeyya Aldudak<sup>1</sup>, Denise Hilfiker-Kleiner<sup>4</sup>, Elisabeth Schieffer<sup>1†</sup>, Bernhard Schieffer<sup>1†\*</sup>

<sup>1</sup> Department of Cardiology, Angiology, and Intensive Care; Philipps University Marburg, Marburg, 35043, Germany

<sup>2</sup> Mass Spectrometry Facility, Department of Chemistry; Philipps University Marburg, Marburg, 35043, Germany

<sup>3</sup> Institute of Translational Proteomics; Philipps University Marburg, Marburg, 35043, Germany

<sup>4</sup> Institute Cardiovascular Complications in Pregnancy and Oncologic Therapies; Philipps University Marburg, Marburg, 35043, Germany

\* Correspondence: [bernhard.schieffer@staff.uni-marburg.de](mailto:bernhard.schieffer@staff.uni-marburg.de)

† These authors contributed equally to this work.

## Supplementary Figures and Tables

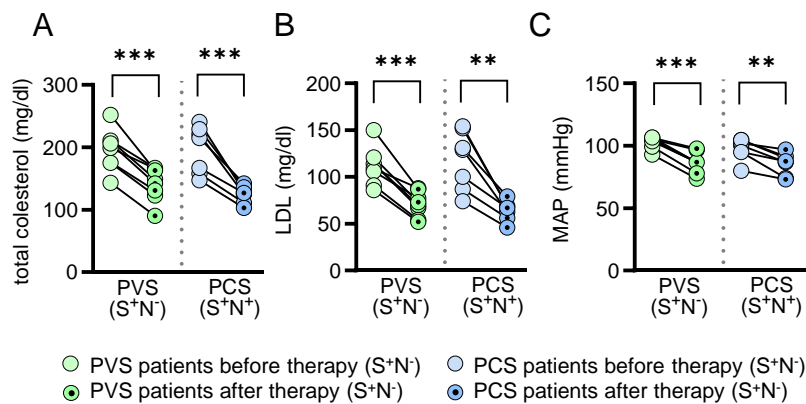

**Supplemental Figure S1. Cholesterol and blood pressure before and after therapy in PVS and PCS patients. (A)** total cholesterol, **(B)** LDL and **(C)** MAP. PVS = post-vaccination syndrome, PCS = post-COVID syndrome, S = spike protein, N = nucleocapsid protein, LDL = low-density lipoprotein, HDL = high-density lipoprotein, MAP = mean arterial pressure.

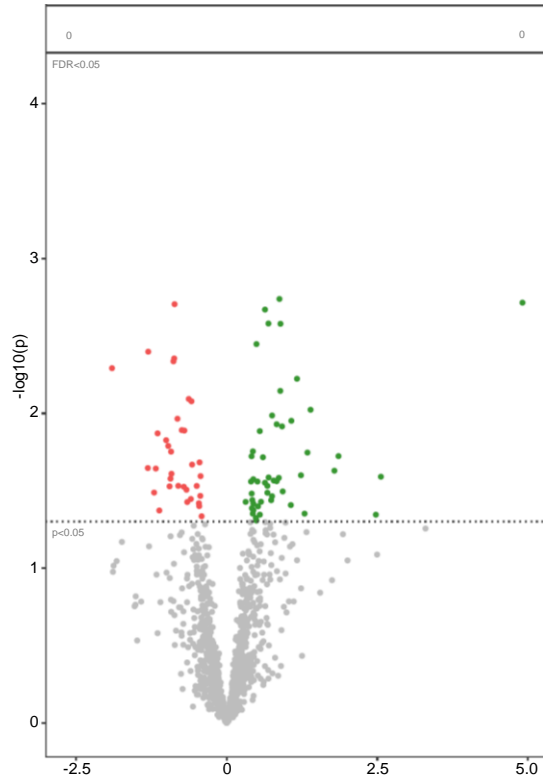

**Supplemental Figure S2.** No differences in protein abundance in the HDL proteome of controls and patients in relation to vaccinated vs. vaccinated with past infection. Protein abundance in the HDL of control and patients (PVS/PCS) were compared in regard to their antibody status ( $S^+N^-$  vs.  $S^+N^+$ ) and are presented as volcano plot. More abundant proteins are shown in green and less abundant proteins are shown in red. PVS = post-vaccination syndrome, PCS = post-COVID syndrome, S = spike protein, N = nucleocapsid protein, HDL = high-density lipoprotein.

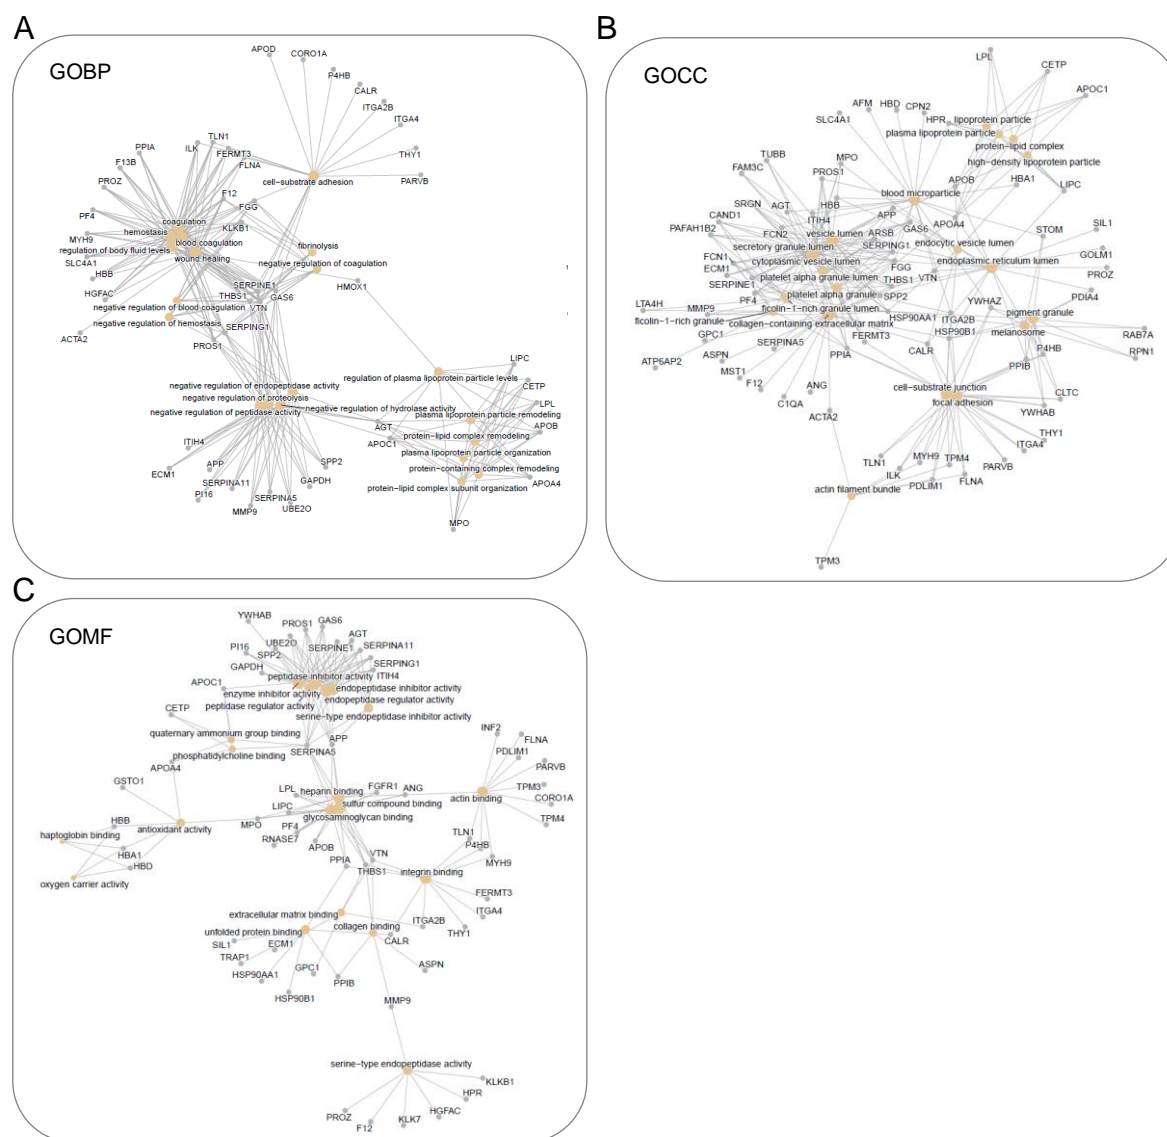

**Supplemental Figure S3.** Differentially abundant proteins ( $p < 0.05$ ) in the HDL proteome of PVS/PCS patients compared to controls are shown in a pathway enrichment analysis using (A) gene ontology biological process (GOBP), (B) gene ontology cellular component (GOCC) and (C) gene ontology molecular function (GOMF) annotations. PVS = post-vaccination syndrome, PCS = post-COVID syndrome, HDL = high-density lipoprotein.

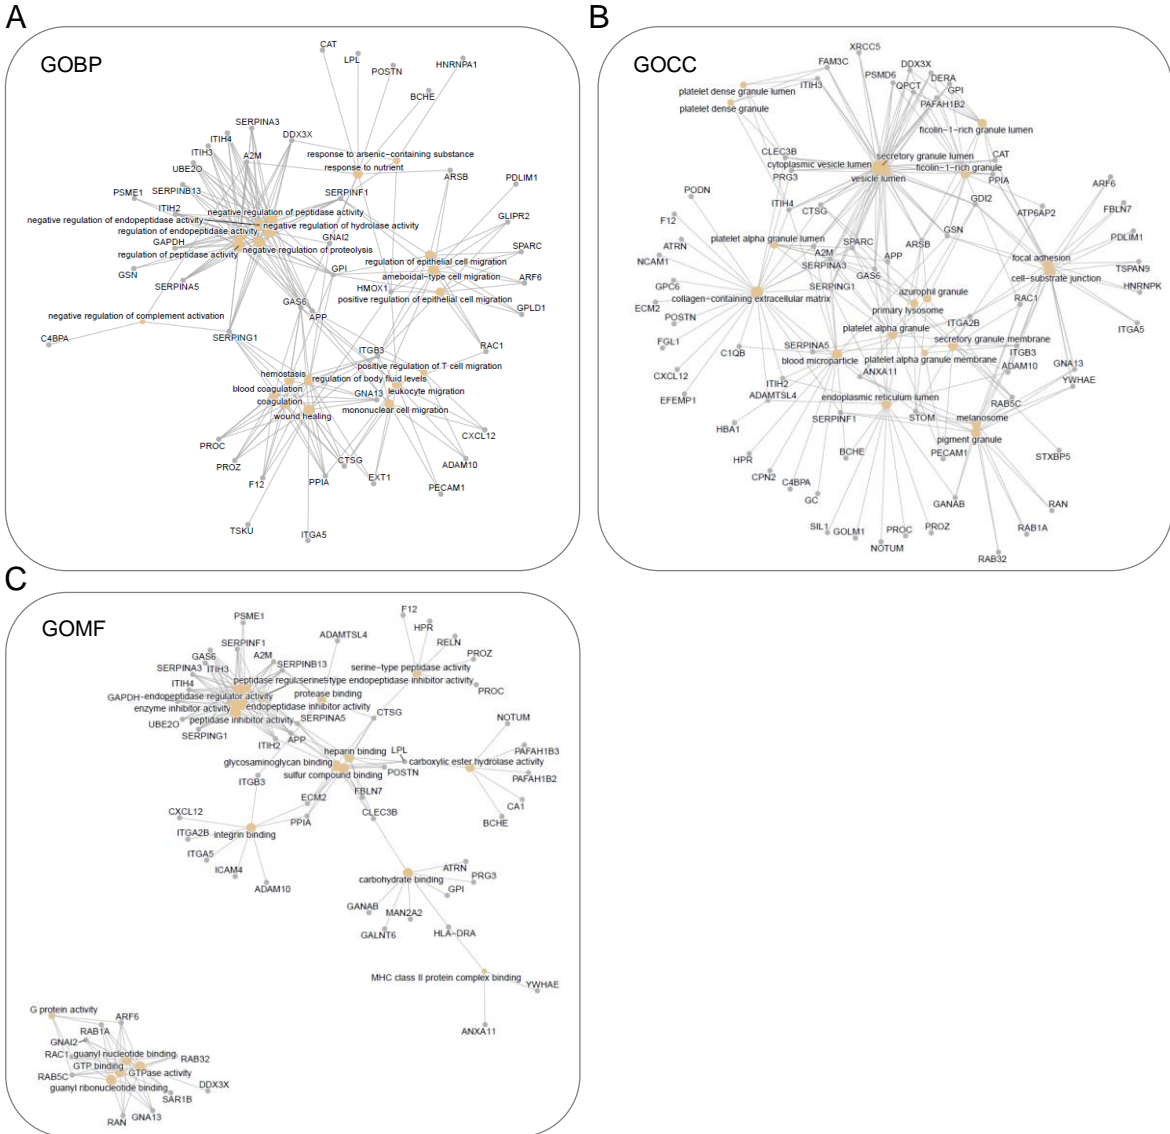

**Supplemental Figure S4.** Differentially abundant proteins ( $p < 0.05$ ) in the HDL proteome of PVS/PCS patients after therapy compared to before are shown in a pathway enrichment analysis using (A) gene ontology biological process (GOBP), (B) gene ontology cellular component (GOCC) and (C) gene ontology molecular function (GOMF) annotations. PVS = post-vaccination syndrome, PCS = post-COVID syndrome, HDL = high-density lipoprotein.

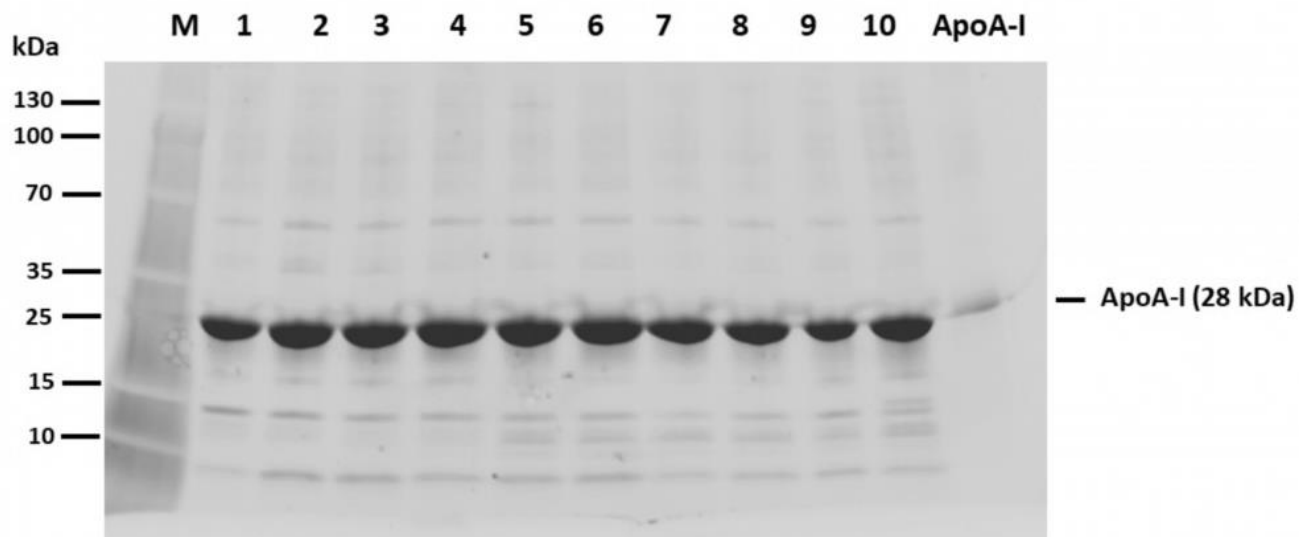

**Supplemental Figure S5.** SDS-PAGE of HDL samples. Inverse image of representative HDL isolates from serum samples subjected to 4-20% SDS-PAGE. 20  $\mu$ g total protein was applied. The major band on the gels represents ApoA-I. Purified human ApoA-I was used as control and a protein ladder as a molecular weight standard (M). kDa = kilodalton. HDL = high-density lipoprotein.

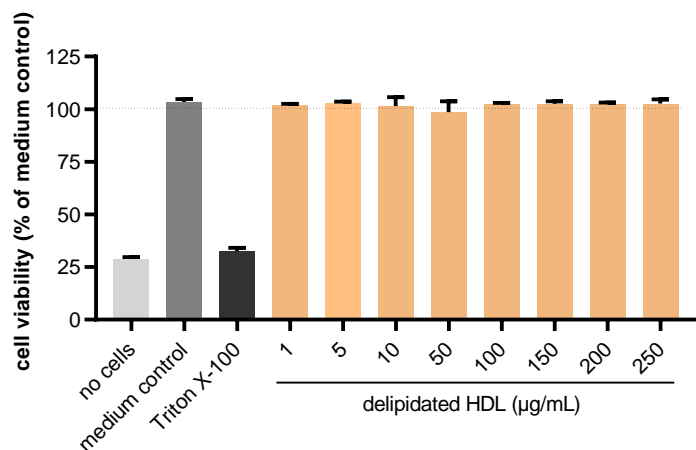

**Supplemental Figure S6.** Cell viability (%) of EAh.926 cells after 6 hrs of stimulation with delipidated HDL (1-250 µg/mL) was determined using alamarBlue cell viability assay. Conditions without cells and Triton X-100 were used as positive controls and cell culture medium as negative control. n = 2. HDL = high-density lipoprotein.

**Supplemental Table S1. Symptoms of PVS and PCS patients.**

| antigen-status                                                                | patients                                     |                                              |
|-------------------------------------------------------------------------------|----------------------------------------------|----------------------------------------------|
|                                                                               | PVS (S <sup>+</sup> /N <sup>-</sup> )<br>n=8 | PCS (S <sup>+</sup> /N <sup>+</sup> )<br>n=7 |
| duration of symptoms (days)                                                   | 319.5(107-376)                               | 329.5(150-400)                               |
| muscle pain                                                                   | 5                                            | 4                                            |
| headache                                                                      | 4                                            | 6                                            |
| impairment of the ability to concentrate and remember                         | 6                                            | 6                                            |
| perceptual and sensory disorders                                              | 6                                            | 4                                            |
| movement coordination disorder,<br>muscle weakness, -twitching                | 6                                            | 4                                            |
| reading disorders, word-finding disorders,<br>information processing disorder | 4                                            | 4                                            |
| dizziness when standing up too quickly                                        | 1                                            | 4                                            |
| dizziness and lightheadedness                                                 | 3                                            | 7                                            |
| impaired intestinal motility                                                  | 6                                            | 4                                            |
| shortness of breath at rest/light physical exertion                           | 6                                            | 3                                            |
| increase or loss of appetite, weight gain or weight loss                      | 6                                            | 3                                            |
| painful lymph nodes                                                           | 4                                            | 1                                            |
| palpitations, rapid pulse, heart stuttering                                   | 7                                            | 5                                            |
| chest pain, chest tightness                                                   | 5                                            | 4                                            |
| brain fog                                                                     | 4                                            | 5                                            |
| fatigue                                                                       | 5                                            | 6                                            |
| restrictions in the social environment                                        | 8                                            | 5                                            |

Median and range are shown for duration of symptoms. Main symptoms reported (prevalence >50%). PVS = post-vaccination syndrome, PCS = post-COVID syndrome, S = spike protein, N = nucleocapsid protein.



**Supplemental Table S2. Comorbidities in controls and PVS/PCS patients.**

| antigen-status                                             | control                               |                                       | patients                                     |                                              |
|------------------------------------------------------------|---------------------------------------|---------------------------------------|----------------------------------------------|----------------------------------------------|
|                                                            | S <sup>+</sup> /N <sup>-</sup><br>n=8 | S <sup>+</sup> /N <sup>+</sup><br>n=8 | PVS (S <sup>+</sup> /N <sup>-</sup> )<br>n=8 | PVS (S <sup>+</sup> /N <sup>+</sup> )<br>n=7 |
| allergies present                                          | 3                                     | 2                                     | 6                                            | 3                                            |
| Hashimoto Thyreoiditis                                     | 1                                     | 1                                     | 2                                            | 1                                            |
| Migraine                                                   | -                                     | 1                                     | 2                                            | 1                                            |
| Scoliosis                                                  | 1                                     | 1                                     | 1                                            | 1                                            |
| state after viral infection<br>(EBV/CMV/Meningitis)        | -                                     | -                                     | 3                                            | -                                            |
| bronchial asthma                                           | 2                                     | -                                     | 1                                            | -                                            |
| endometriosis                                              | -                                     | 1                                     | 1                                            | -                                            |
| neurodermatitis                                            | -                                     | -                                     | 1                                            | 1                                            |
| spinal stenosis                                            | -                                     | -                                     | -                                            | 1                                            |
| cranio mandibular dysfunction                              | -                                     | -                                     | 1                                            | -                                            |
| herniated disc                                             | -                                     | -                                     | 1                                            | -                                            |
| condition after type b gastritis                           | -                                     | -                                     | -                                            | -                                            |
| diabetes mellitus I                                        | -                                     | -                                     | 1                                            | -                                            |
| hypothyreosis                                              | -                                     | -                                     | 1                                            | -                                            |
| chronic back pain                                          | -                                     | -                                     | -                                            | 1                                            |
| primary M. Raynaud                                         | -                                     | -                                     | 1                                            | -                                            |
| state after M. Hodgkin                                     | -                                     | -                                     | 1                                            | -                                            |
| condition after hemorrhagic<br>shock with mass transfusion | -                                     | -                                     | -                                            | 1                                            |
| state after cervical cancer                                | 1                                     | -                                     | -                                            | -                                            |
| Morbus Meulengracht                                        | 1                                     | -                                     | -                                            | -                                            |
| benign paroxysmal positional<br>vertigo                    | -                                     | 1                                     | -                                            | -                                            |
| polyneuropathy                                             | 1                                     | -                                     | -                                            | -                                            |
| M. Basedow                                                 | 1                                     | -                                     | -                                            | -                                            |
| arterial hypertension                                      | 1                                     | -                                     | -                                            | -                                            |

PVS = post-vaccination syndrome, PCS = post-COVID syndrome, S = spike protein, N = nucleocapsid protein.

**Supplemental Table S3. Medication of PVS and PCS patients.**

|                          | PVS patients                         | PCS patients                         |
|--------------------------|--------------------------------------|--------------------------------------|
| antigen-status           | S <sup>+</sup> /N <sup>-</sup> (n=8) | S <sup>+</sup> /N <sup>+</sup> (n=7) |
| <i>statin</i>            |                                      |                                      |
| Rosuvastatin (10 mg/day) | 6                                    | 5                                    |
| Simvastatin (20 mg/day)  | 2                                    | 1                                    |
| Atorvastatin (10 mg/day) | -                                    | 1                                    |
| <i>ARB</i>               |                                      |                                      |
| Candesartan (4 mg/day)   | 1                                    | 1                                    |
| Candesartan (8 mg/day)   | 6                                    | 3                                    |
| Candesartan (16 mg/day)  | -                                    | 2                                    |
| Telmisartan (20 mg/day)  | -                                    | 1                                    |
| Telmisartan (80 mg/day)  | 1                                    | -                                    |

PVS = post-vaccination syndrome, PCS = post-COVID syndrome, S = spike protein, N = nucleocapsid protein. ARB = angiotensin II receptor blocker.

**Supplemental Table S4. Blood pressure and cholesterol and its fractions inflammatory markers in healthy controls and PVS/PCS patients before and after therapy.**

|                                 | control                        | PVS patients                            |                                         |                                               | control                        | PCS patients                            |                                         |                                               |
|---------------------------------|--------------------------------|-----------------------------------------|-----------------------------------------|-----------------------------------------------|--------------------------------|-----------------------------------------|-----------------------------------------|-----------------------------------------------|
| antigen-status                  | S <sup>+</sup> /N <sup>-</sup> | S <sup>+</sup> /N <sup>-</sup><br>(n=8) | S <sup>+</sup> /N <sup>-</sup><br>(n=8) |                                               | S <sup>+</sup> /N <sup>+</sup> | S <sup>+</sup> /N <sup>+</sup><br>(n=7) | S <sup>+</sup> /N <sup>+</sup><br>(n=7) |                                               |
| therapy                         | no                             | before                                  | after                                   | P                                             | no                             | before                                  | after                                   | P                                             |
| systolic blood pressure (mmHg)  | -                              | 129<br>(108-138)                        | 110<br>(96-129)                         | A -<br>B -<br>C <u>0.02</u>                   | -                              | 122<br>(100-132)                        | 110<br>(83-122)                         | A -<br>B -<br>C <u>0.008</u>                  |
| diastolic blood pressure (mmHg) | -                              | 91<br>(84-99)                           | 75<br>(59-85)                           | A -<br>B -<br>C <u>0.009</u>                  | -                              | 89<br>(70-96)                           | 76<br>(68-85)                           | A -<br>B -<br>C <u>0.0006</u>                 |
| MAP (mmHg)                      | -                              | 105<br>(93-107)                         | 87<br>(74-98)                           | A -<br>B -<br>C <u>0.00004</u>                |                                | 100<br>(80-105)                         | 88<br>(73-97)                           | A -<br>B -<br>C <u>0.002</u>                  |
| total cholesterol (mg/dl)       | 191.5<br>(154-399)             | 202.5<br>(143-252)                      | 145.0<br>(90-167)                       | A 0.439<br>B <u>0.019</u><br>C <u>0.00003</u> | 180.5<br>(141-213)             | 215.0<br>(147-241)                      | 127.0<br>(103-142)                      | A 0.283<br>B <u>0.0003</u><br>C <u>0.0006</u> |
| LDL (mg/dl)                     | 111.5<br>(89-255)              | 111.5<br>(86-150)                       | 71.5<br>(52-88)                         | A 0.360<br>B <u>0.011</u><br>C <u>0.00005</u> | 109.0<br>(79-127)              | 129.0<br>(74-154)                       | 67.0<br>(46-79)                         | A 0.363<br>B <u>0.0002</u><br>C <u>0.001</u>  |
| HDL (mg/dl)                     | 58.0<br>(51-68)                | 63.5<br>(45-78)                         | 62.5<br>(38-77)                         | A 0.328<br>B 0.786<br>C 0.056                 | 52.5<br>(46-68)                | 53.0<br>(46-64)                         | 51.0<br>(43-56)                         | A 0.804<br>B 0.272<br>C 0.200                 |

Median and range are shown. PVS = post-vaccination syndrome, PCS = post-COVID syndrome, S = spike protein, N = nucleocapsid protein, LDL = low-density lipoprotein, HDL = high-density lipoprotein, MAP = mean arterial pressure. A = PVS/PCS patients before therapy vs. control, B = PVS/PCS patients after therapy vs. control, C = PVS/PCS patients after therapy vs. PVS/PCS patients before therapy.

**Supplemental Table S5. Circulating inflammatory markers in healthy controls and PVS/PCS patients before and after therapy.**

|                      | Control                        | PVS patients                            |                                         |         | control                        | PCS patients                            |                                         |         |
|----------------------|--------------------------------|-----------------------------------------|-----------------------------------------|---------|--------------------------------|-----------------------------------------|-----------------------------------------|---------|
| antigen-status       | S <sup>+</sup> /N <sup>-</sup> | S <sup>+</sup> /N <sup>-</sup><br>(n=8) | S <sup>+</sup> /N <sup>-</sup><br>(n=8) |         | S <sup>+</sup> /N <sup>+</sup> | S <sup>+</sup> /N <sup>+</sup><br>(n=7) | S <sup>+</sup> /N <sup>+</sup><br>(n=7) |         |
| therapy              | No                             | before                                  | after                                   | P       | no                             | before                                  | after                                   | P       |
| leucocytes (G/l)     | 6.3<br>(4.5-8.7)               | 7.3<br>(5.0-11.3)                       | 6.8<br>(5.8-10.7)                       | A 0.326 | 6.5<br>(3.5-7.1)               | 5.4<br>(4.1-6.7)                        | 5.1<br>(4.3-6.1)                        | A 0.398 |
|                      |                                |                                         |                                         | B 0.458 |                                |                                         |                                         | B 0.064 |
|                      |                                |                                         |                                         | C 0.593 |                                |                                         |                                         | C 0.159 |
| lymphocytes (G/l)    | 1.9<br>(1.2-3.0)               | 1.7<br>(1.1-2.9)                        | 1.9<br>(1.2-3.0)                        | A 0.709 | 1.8<br>(1.1-2.7)               | 1.6<br>(1.2-1.9)                        | 1.7<br>(1.4-2.1)                        | A 0.246 |
|                      |                                |                                         |                                         | B 0.876 |                                |                                         |                                         | B 0.395 |
|                      |                                |                                         |                                         | C 0.090 |                                |                                         |                                         | C 0.329 |
| monocytes (%)        | 8.8<br>(4.4-9.6)               | 6.9<br>(5.2-10.2)                       | 6.9<br>(5.1-9.4)                        | A 0.309 | 6.3<br>(5.0-11.0)              | 8.4<br>(6.6-11.2)                       | 8.4<br>(7.3-10.1)                       | A 0.193 |
|                      |                                |                                         |                                         | B 0.275 |                                |                                         |                                         | B 0.077 |
|                      |                                |                                         |                                         | C 0.906 |                                |                                         |                                         | C 0.470 |
| CRP (mg/dl)          | 1.1<br>(0.2-10.8)              | 1.2<br>(0.2-6.2)                        | 1.3<br>(0.3-7.2)                        | A 0.659 | 1.5<br>(0.2-6.5)               | 0.7<br>(0.5-2.4)                        | 0.4<br>(0.2-2.1)                        | A 0.197 |
|                      |                                |                                         |                                         | B 0.883 |                                |                                         |                                         | B 0.100 |
|                      |                                |                                         |                                         | C 0.273 |                                |                                         |                                         | C 0.003 |
| IL-1 (ng/l)          | 5.0<br>(5.0-22.1)              | 5.0<br>(5.0-8.7)                        | 5.0<br>(5.0-5.0)                        | A 0.214 | 5.0<br>(5.0-6.6)               | 5.0<br>(5.0-5.6)                        | 5.0<br>(5.0-5.5)                        | A 0.335 |
|                      |                                |                                         |                                         | B 0.182 |                                |                                         |                                         | B 0.272 |
|                      |                                |                                         |                                         | C 0.373 |                                |                                         |                                         | C 0.830 |
| sIL-2R (kU/l)        | 346.0<br>(265-648)             | 438.0<br>(330-647)                      | 422.5<br>(370-698)                      | A 0.426 | 467.5<br>(275-680)             | 417.0<br>(406-515)                      | 448.0<br>(302-1155)                     | A 0.748 |
|                      |                                |                                         |                                         | B 0.194 |                                |                                         |                                         | B 0.606 |
|                      |                                |                                         |                                         | C 0.761 |                                |                                         |                                         | C 0.496 |
| IL-6 (pg/ml)         | 1.5<br>(1.5-3.0)               | 2.0<br>(2.0-8.0)                        | 1.8<br>(1.5-6.0)                        | A 0.301 | 1.5<br>(1.5-6.0)               | 2.0<br>(1.5-2.0)                        | 2.0<br>(1.5-3.0)                        | A 0.511 |
|                      |                                |                                         |                                         | B 0.534 |                                |                                         |                                         | B 0.747 |
|                      |                                |                                         |                                         | C 0.067 |                                |                                         |                                         | C 0.407 |
| IL-8 (ng/l)          | 6.7<br>(5.0-8.1)               | 8.0<br>(5.0-13.2)                       | 10.3<br>(6.3-13.3)                      | A 0.190 | 6.9<br>(5.0-35.9)              | 7.0<br>(5.0-10.4)                       | 8.8<br>(5.0-18.1)                       | A 0.441 |
|                      |                                |                                         |                                         | B 0.056 |                                |                                         |                                         | B 0.818 |
|                      |                                |                                         |                                         | C 0.231 |                                |                                         |                                         | C 0.380 |
| IL-10 (ng/l)         | 5.0<br>(5.0-5.0)               | 5.0<br>(5.0-6.9)                        | 5.0<br>(5.0-5.0)                        | A 0.453 | 5.0<br>(5.0-5.0)               | 5.0<br>(5.0-11.4)                       | 5.0<br>(5.0-14.0)                       | A 0.300 |
|                      |                                |                                         |                                         | B 0.297 |                                |                                         |                                         | B 0.300 |
|                      |                                |                                         |                                         | C 0.363 |                                |                                         |                                         | C 0.373 |
| TNF- $\alpha$ (ng/l) | 6.1<br>(5.3-9.8)               | 5.0<br>(4.0-8.1)                        | 7.3<br>(4.0-9.8)                        | A 0.288 | 6.0<br>(4.8-7.8)               | 6.2<br>(4.2-6.9)                        | 7.0<br>(5.5-11.2)                       | A 0.716 |
|                      |                                |                                         |                                         | B 0.952 |                                |                                         |                                         | B 0.209 |
|                      |                                |                                         |                                         | C 0.872 |                                |                                         |                                         | C 0.905 |

Median and range are shown. PVS = post-vaccination syndrome, PCS = post-COVID syndrome, S = spike protein, N = nucleocapsid protein, CRP = c-reactive protein, IL = interleukin, sIL-2R = soluble interleukin 2 receptor, TNF = tumor necrosis factor. P-values: A = PVS/PCS patients before therapy vs. control, B = PVS/PCS patients after therapy vs. control, C = PVS/PCS patients after therapy vs. PVS/PCS patients before therapy.

**Supplemental Table S6. Medication and changes in total cholesterol, LDL, HDL, MAP and scoring of PVS and PCS patients.**

| antigen-status                                       | statin                   | change (mg/dl) |     | ARB                     | change (mmHg) | improvement/deterioration (scoring) |     |     |       |
|------------------------------------------------------|--------------------------|----------------|-----|-------------------------|---------------|-------------------------------------|-----|-----|-------|
|                                                      |                          | chol.          | LDL |                         |               | Bell                                | CFQ | FAS | SF-36 |
| PVS patients<br>S <sup>+</sup> /N <sup>-</sup> (n=8) | Rosuvastatin (10 mg/day) | -52            | -47 | Candesartan (8 mg/day)  | -8.3          | +                                   | +   | +   | +     |
|                                                      | Rosuvastatin (10 mg/day) | -44            | -21 | Candesartan (8 mg/day)  | -17.7         | +                                   | +   | +   | +     |
|                                                      | Rosuvastatin (10 mg/day) | -33            | -29 | Candesartan (8 mg/day)  | -19.3         | +                                   | +   | +   | +     |
|                                                      | Rosuvastatin (10 mg/day) | -62            | -44 | Candesartan (8 mg/day)  | -18.3         | +                                   | +   | o   | +     |
|                                                      | Rosuvastatin (10 mg/day) | -89            | -63 | Candesartan (8 mg/day)  | -21.3         | +                                   | +   | o   | +     |
|                                                      | Rosuvastatin (10 mg/day) | -64            | -48 | Telmisartan (80 mg/day) | -8.7          | +                                   | +   | +   | +     |
|                                                      | Simvastatin (20 mg/day)  | -45            | -37 | Candesartan (4 mg/day)  | -17.0         | +                                   | +   | -   | +     |
|                                                      | Simvastatin (20 mg/day)  | -53            | -34 | Candesartan (8 mg/day)  | -20.0         | +                                   | +   | +   | +     |
| PCS patients<br>S <sup>+</sup> /N <sup>+</sup> (n=7) | Rosuvastatin (10 mg/day) | -96            | -66 | Candesartan (4 mg/day)  | -13.7         | +                                   | +   | +   | +     |
|                                                      | Rosuvastatin (10 mg/day) | -112           | -83 | Candesartan (8 mg/day)  | -13.3         | +                                   | +   | +   | +     |
|                                                      | Rosuvastatin (10 mg/day) | -73            | -52 | Candesartan (8 mg/day)  | -5.0          | +                                   | +   | +   | +     |
|                                                      | Rosuvastatin (10 mg/day) | -93            | -85 | Candesartan (16 mg/day) | -14.7         | +                                   | +   | +   | +     |
|                                                      | Rosuvastatin (10 mg/day) | -47            | -31 | Candesartan (16 mg/day) | -21.0         | +                                   | +   | +   | +     |
|                                                      | Simvastatin (20 mg/day)  | -44            | -28 | Candesartan (8 mg/day)  | -7.3          | +                                   | +   | +   | +     |
|                                                      | Atorvastatin (10 mg/day) | -40            | -33 | Telmisartan (20 mg/day) | -7.0          | +                                   | +   | +   | +     |

PVS = post-vaccination syndrome, PCS = post-COVID syndrome, S = spike protein, N = nucleocapsid protein, chol. = total cholesterol, LDL = low-density lipoprotein, ARB = angiotensin II receptor blocker, MAP = mean arterial pressure, Bell = Bell disability score, CFQ = Chalder fatigue scale, FAS = fatigue assessment scale, SF-36 = SF-36 physical functioning sum scale, + = improvement, - = deterioration, o = no change.

**Supplemental Table S7. Significantly altered proteins in the HDL proteome of PVS/PCS patients vs. controls.**

| acronym         | full name                                                    | Uniprot ID        | gene ID | log2 (FC) | FDR   | HDL prot. | kDa           |
|-----------------|--------------------------------------------------------------|-------------------|---------|-----------|-------|-----------|---------------|
| <i>enhanced</i> |                                                              |                   |         |           |       |           |               |
| MYL6            | myosin light polypeptide 6                                   | P60660            | 4637    | 2.27      | 0.001 | +         | 16.9          |
| APP             | amyloid-beta precursor protein                               | P05067            | 351     | 1.38      | 0.002 | -         | 86.9          |
| TLN1            | talin-1                                                      | Q9Y490            | 7094    | 1.70      | 0.002 | +*        | 26.9          |
| PPIA            | peptidyl-prolyl cis-trans isomerase A                        | P62937            | 5478    | 1.37      | 0.003 | +         | 18.0          |
| HBB             | hemoglobin subunit beta                                      | P68871            | 3043    | 1.53      | 0.006 | +*        | 15.9          |
| HGFA            | hepatocyte growth factor activator                           | Q04756            | 3083    | 1.09      | 0.006 | +         | 70.6          |
| PARVB           | beta-parvin                                                  | Q9HBI1            | 29780   | 1.85      | 0.006 | +*        | 41.7          |
| TPM4            | tropomyosin alpha-4 chain                                    | P67936            | 7171    | 1.32      | 0.006 | +         | 28.5          |
| MAN1A1          | mannosyl-oligosaccharide 1,2-alpha-mannosidase IA            | P33908            | 4121    | 1.08      | 0.006 | -         | 72.9          |
| FERMT3          | FERM domain containing kindlin 3                             | Q86UX7            | 83706   | 1.20      | 0.006 | +*        | 75.9          |
| HBD             | hemoglobin subunit delta                                     | P02042            | 3045    | 1.53      | 0.009 | +         | 16.0          |
| MST1            | hepatocyte growth factor-like protein                        | P26927            | 4485    | 1.22      | 0.012 | -         | 80.3          |
| TRAP1           | heat shock protein 75 kDa                                    | Q12931            | 10131   | 2.04      | 0.017 | -         | 80.1          |
| FLNA            | filamin-A                                                    | P21333            | 2316    | 1.14      | 0.017 | +*        | 280.7         |
| PIBF1           | progesterone-induced-blocking factor 1                       | Q8WXW3            | 10464   | 1.73      | 0.018 | +         | 89.8          |
| HBA1            | hemoglobin subunit alpha                                     | P69905            | 3039    | 1.47      | 0.026 | +*        | 15.2          |
| PROZ            | vitamin K-dependent protein Z                                | P22891            | 8858    | 1.20      | 0.028 | +         | 44.7          |
| NAPA            | alpha-soluble NSF attachment protein                         | P54920            | 8775    | 0.86      | 0.031 | -         | 33.2          |
| HSP90B1         | heat shock protein 90 beta family member 1                   | P14625            | 7184    | 0.91      | 0.031 | +         | 92.4          |
| SERPINA11       | serpin A11                                                   | Q86U17            | 256394  | 0.83      | 0.041 | +*        | 46.9          |
| <i>reduced</i>  |                                                              |                   |         |           |       |           |               |
| PF4;PF4V1       | platelet factor 4                                            | P02776;<br>P10720 | 5196    | -2.66     | 0.001 | -         | 10.8,<br>11.5 |
| NT5DC3          | 5'-nucleotidase domain-containing protein 3                  | Q86UY8            | 51559   | -2.06     | 0.002 | -         | 63.4          |
| PAFAH1B2        | platelet-activating factor acetylhydrolase IB subunit alpha2 | P68402            | 5049    | -3.55     | 0.006 | -         | 25.5          |
| ATP6AP2         | ATPase H <sup>+</sup> transporting accessory protein 2       | O75787            | 10159   | -0.97     | 0.029 | -         | 39.0          |
| ARSB            | arylsulfatase B                                              | P15848            | 411     | -0.67     | 0.031 | -         | 59.6          |
| ITIH4           | inter-alpha-trypsin inhibitor heavy chain H4                 | Q14624            | 3700    | -0.62     | 0.044 | +*        | 103.3         |

PVS = post-vaccination syndrome, PCS = post-COVID syndrome, FC = fold-change, FDR = false discovery rate, HDL prot. = high-density lipoprotein proteome watch +\* = detected in at least 3 different studies (HDL proteome watch).

**Supplemental Table S8. Significantly altered proteins in the HDL proteome of PVS/PCS patients after vs. before therapy.**

| acronym         | full name                                                      | Uniprot ID | gene ID | log2 (FC) | FDR   | HDL prot. | kDa  |
|-----------------|----------------------------------------------------------------|------------|---------|-----------|-------|-----------|------|
| <i>enhanced</i> |                                                                |            |         |           |       |           |      |
| FAM3C           | FAM3 metabolism-regulating signaling molecule C                | Q92520     | 10447   | 2.00      | 0.029 | -         | 24.6 |
| ATP6AP2         | ATPase H <sup>+</sup> transporting accessory protein 2         | O75787     | 10159   | 1.15      | 0.029 | -         | 39.0 |
| ADAM10          | disintegrin and metalloproteinase domain-containing protein 10 | O14672     | 102     | 1.00      | 0.034 | -         | 84.1 |

PCS = post-COVID syndrome, FC = fold-change, FDR = false discovery rate, HDL prot. = high-density lipoprotein proteome watch.

**Supplemental Table S9. Summary of significantly altered proteins in the HDL proteome of PVS/PCS patients vs. controls and of PVS/PCS patients after vs. before therapy.**

| PVS/PCS patients vs. control |                | PVS/PCS patients after therapy vs.<br>PVS/PCS patients before therapy |
|------------------------------|----------------|-----------------------------------------------------------------------|
| <i>enhanced</i>              | <i>reduced</i> | <i>enhanced</i>                                                       |
| MYL6                         | PF4;PF4V1      | FAM3C                                                                 |
| APP                          | NT5DC3         | <b>ATP6AP2</b>                                                        |
| TLN1                         | PAFAH1B2       | ADAM10                                                                |
| PPIA                         | <b>ATP6AP2</b> |                                                                       |
| HBB                          | ARSB           |                                                                       |
| HGFA                         | ITIH4          |                                                                       |
| PARVB                        |                |                                                                       |
| TPM4                         |                |                                                                       |
| MAN1A1                       |                |                                                                       |
| FERMT3                       |                |                                                                       |
| HBD                          |                |                                                                       |
| MST1                         |                |                                                                       |
| TRAP1                        |                |                                                                       |
| FLNA                         |                |                                                                       |
| PIBF1                        |                |                                                                       |
| HBA1                         |                |                                                                       |
| PROZ                         |                |                                                                       |
| NAPA                         |                |                                                                       |
| HSP90B1                      |                |                                                                       |
| SERPINA11                    |                |                                                                       |
